# Supplementary material for: An intelligent light-driven thermoelectric conversion system through the thermosensitive phase transition of vanadium dioxide
Source: Royal Society of Chemistry journal article supplement (doi:10.1039/c9ta01864f), 2019-01-01
Supplement: c9ta01864f1.pdf [file c9ta01864f1.pdf]

## Electronic Supplementary Information

### Intelligent Light-driven Thermoelectric Conversion System through the Thermosensitive Phase Transition of Vanadium Dioxide

*Yuang Zhang, Malik Muhammad Umair, Xin Jin, Rongwen Lu, Shufen Zhang and  
Bingtao Tang\**

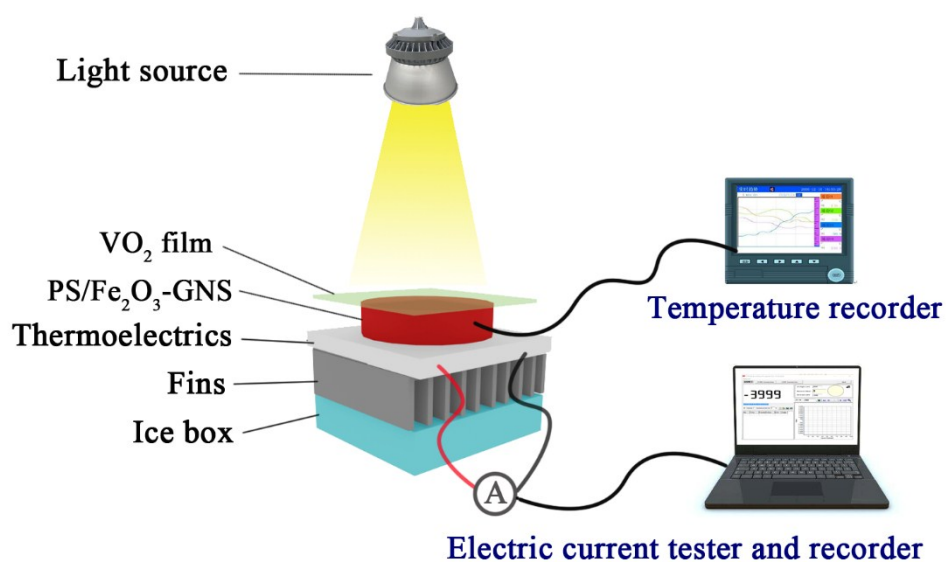

**Figure S1** The device diagram of light-thermal-electric energy conversion tests

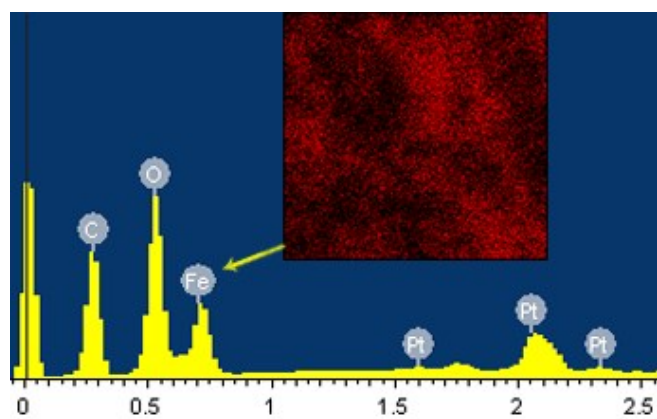

**Figure S2** The corresponding EDS analysis of  $\text{Fe}_2\text{O}_3$ -GNS

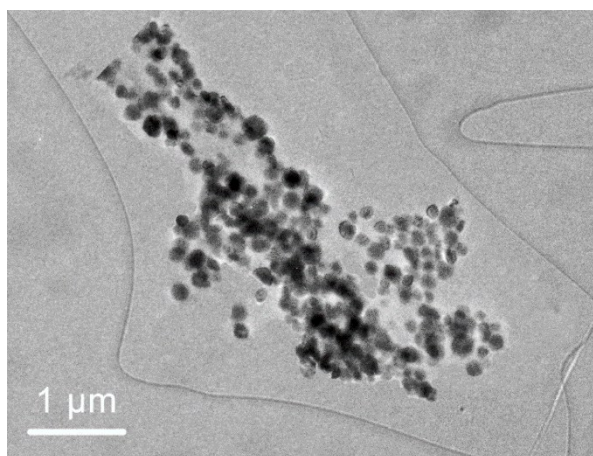

**Figure S3** TEM image of PS/ $\text{Fe}_2\text{O}_3$ -GNS

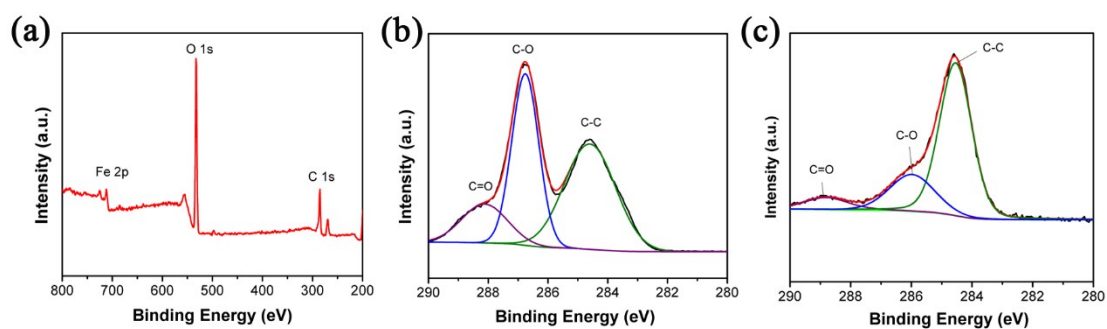

**Figure S4** a) XPS survey spectrum of  $\text{Fe}_2\text{O}_3$ -GNS. b) C 1s XPS spectra of GO. c) C 1s XPS spectra of  $\text{Fe}_2\text{O}_3$ -GNS.

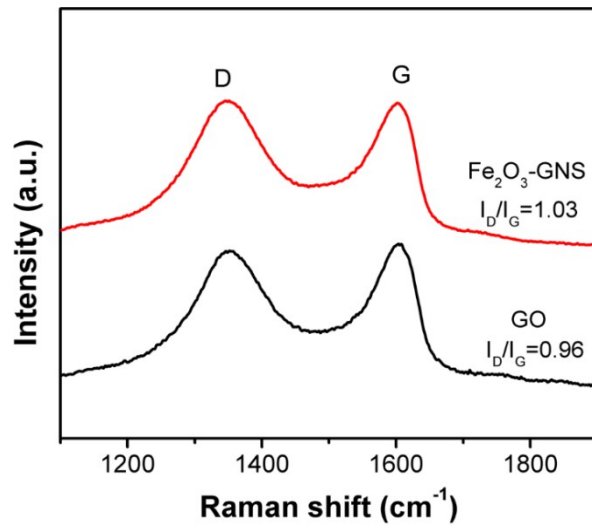

Figure S5 Raman spectra of GO (a) and Fe<sub>2</sub>O<sub>3</sub>-GNS (b)

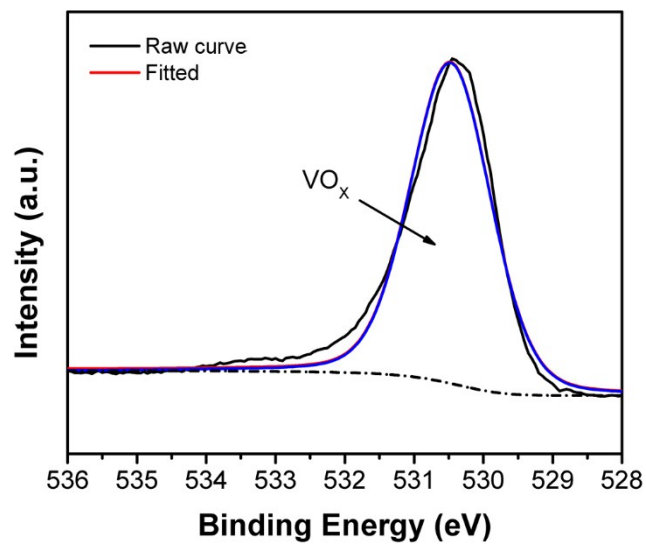

Figure S6 O 1s XPS spectra of VO<sub>2</sub> film

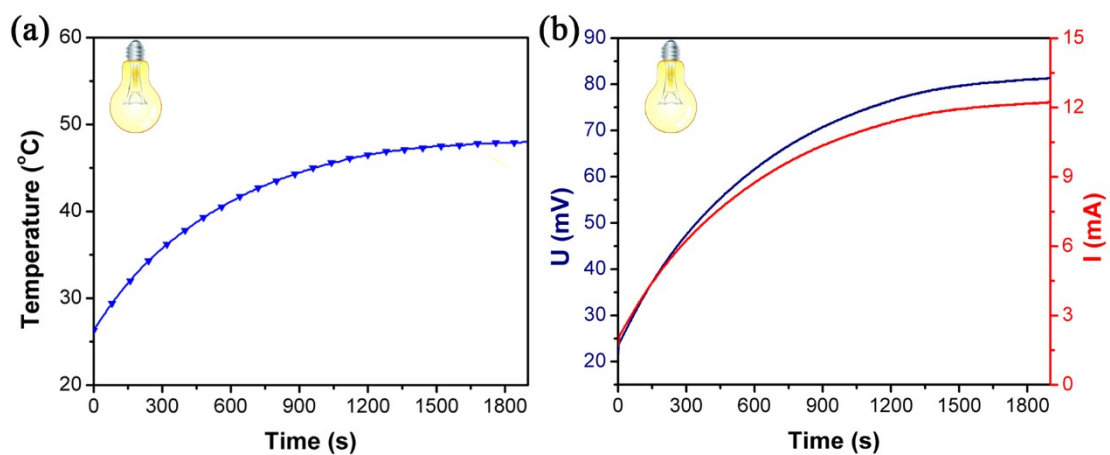

**Figure S7** Light-thermal-electric energy conversion measurement of pure PS. a) The temperature-time curves of pure PS under simulated light source ( $I=350 \text{ mW cm}^{-2}$ ). b) The voltage/current-time curves of pure PS under simulated light source ( $I=350 \text{ mW cm}^{-2}$ ).
